# Supplementary material for: Glucosylsphingosine (Lyso-Gb1): An Informative Biomarker in the Clinical Monitoring of Patients with Gaucher Disease
Source: MDPI journal article supplement (doi:10.3390/ijms232314938), 2022-11-29
Supplement: s1 [file s1]

**Supplemental Table S1. Patient organ volumes.**

|           | Spleen    |             |            | Liver       |     |
|-----------|-----------|-------------|------------|-------------|-----|
|           | Age (yrs) | Volume (ml) | MN         | Volume (ml) | MN  |
| Patient 1 | 30.3      | 769         | 4.9        | 2109        | 1.1 |
|           | 31.4      | 643         | 3.8        | 1754        | 0.8 |
|           | 33.1      | 821         | 4.8        | 1800        | 0.8 |
|           | 34.8      | 406         | 2.3        | 1429        | 0.6 |
|           | 36.8      | 459         | 2.8        | 1840        | 0.9 |
|           | 38.1      | 428         | 2.7        | 1644        | 0.8 |
|           | 39.9      | 364         | 2.2        | 1663        | 0.8 |
|           | 41.0      | 368         | 2.2        | 1742        | 0.8 |
|           | 44.3      | <b>319</b>  | <b>1.8</b> | 1622        | 0.7 |
|           | 46.4      | <b>306</b>  | <b>1.7</b> | 1724        | 0.8 |
|           | 49.7      | <b>254</b>  | <b>1.3</b> | 1649        | 0.7 |
| Patient 2 | 12.4      | 870         | 13.3       | 1098        | 1.3 |
|           | 13.4      | 555         | 6.5        | 1097        | 1.0 |
|           | 15.0      | 569         | 5.2        | 1119        | 0.8 |
|           | 16.3      | 527         | 4.8        | 1163        | 0.8 |
|           | 17.9      | 408         | 3.4        | 1183        | 0.8 |
|           | 24.1      | 535         | 3.9        | 1497        | 0.9 |
|           | 27.1      | 555         | 3.6        | 1474        | 0.8 |
| Patient 3 | 30.2      | 1300        | 7.4        | 2600        | 1.2 |
|           | 32.2      | 673         | 3.8        | 2200        | 1.0 |
|           | 37.5      | 498         | 2.6        | 2186        | 0.9 |
|           | 38.8      | 526         | 2.7        | 2543        | 1.0 |
|           | 40.2      | 474         | 2.4        | 2294        | 0.9 |
|           | 42.1      | 506         | 2.4        | 2594        | 1.0 |
|           | 44.5      | 394         | 2.0        | 2182        | 0.9 |
|           | 47.0      | 417         | 2.1        | 2557        | 1.0 |
| Patient 4 | 62.1      | 382         | 3.1        | 1593        | 1.0 |
|           | 64.9      | 345         | 2.9        | 1502        | 1.0 |
| Patient 5 | 40.7      | 1906        | 16.5       | 1671        | 1.2 |
|           | 41.7      | 1839        | 16.2       | 1851        | 1.3 |
|           | 43.9      | 1632        | 13.7       | 1951        | 1.3 |
|           | 44.9      | 1440        | 11.7       | 1605        | 1.0 |
|           | 45.9      | 1494        | 12.5       | 1732        | 1.2 |
|           | 47.5      | 954         | 8.0        | 1797        | 1.2 |
| Patient 6 | 1.8       | 355         | 16.0       | 631         | 2.3 |
|           | 2.8       | 125         | 4.6        | 476         | 1.4 |
|           | 4.0       | 90          | 2.9        | 210         | 0.5 |
|           | 4.9       | 130         | 3.8        | 595         | 1.4 |
|           | 5.9       | 141         | 3.9        | 763         | 1.7 |
|           | 6.6       | 134         | 3.3        | 622         | 1.2 |
|           | 7.5       | 151         | 3.4        | 775         | 1.4 |
|           | 11.4      | 168         | 2.8        | 978         | 1.3 |
|           | 13.6      | 204         | 2.8        | 1001        | 1.1 |
|           | 15.9      | 278         | 2.9        | 1372        | 1.2 |
|           | 17.9      | 225         | 2.2        | 1149        | 0.9 |
|           | 19.9      | 269         | 2.6        | 1285        | 1.0 |
|           | 22.3      | 677         | 6.5        | 1804        | 1.4 |
|           | 25.0      | 995         | 8.7        | 2208        | 1.5 |
| Patient 7 | 18.4      | 2055        | 16.0       | 2286        | 1.4 |
|           | 18.9      | 1288        | 9.7        | 2043        | 1.2 |
|           | 19.4      | 1109        | 8.0        | 1947        | 1.1 |
|           | 19.9      | 993         | 7.5        | 1859        | 1.1 |
|           | 20.4      | 1000        | 7.3        | 2031        | 1.2 |
|           | 20.9      | 900         | 6.8        | 2030        | 1.2 |
|           | 22.0      | 751         | 5.8        | 2092        | 1.3 |
|           | 23.0      | 694         | 5.3        | 1750        | 1.1 |
|           | 24.2      | 580         | 4.7        | 1864        | 1.2 |
|           | 36.1      | 592         | 4.5        | 1584        | 1.0 |
|           | 41.1      | 363         | 2.7        | 1521        | 0.9 |
|           | 44.3      | 315         | 2.2        | 1761        | 1.0 |
|           | 46.3      | <b>283</b>  | <b>1.9</b> | 1915        | 1.0 |

Gray shading denotes treatment switch to velaglycerase alfa.

Blue shading denotes treatment switch to eliglustat.

Bold numbers denotes normal splenic volume.
